# Supplementary material for: Collaborative research to support urban agriculture in the face of change: The case of the Sumida watercress farm on O‘ahu
Source: PLOS journal article supplement (doi:10.1371/journal.pone.0235661), 2020-07-23

Supplemental Figure 1. Sumida Farm and surrounding groundwater pumping wells in the Waimalu groundwater management unit (black dot indicates location of Sumida Farm; red dots denote pumping wells strongly weighted in the inverse-distance weighted sum; purple dots denote pumping wells weakly weighted in the inverse-distance weighted sum).

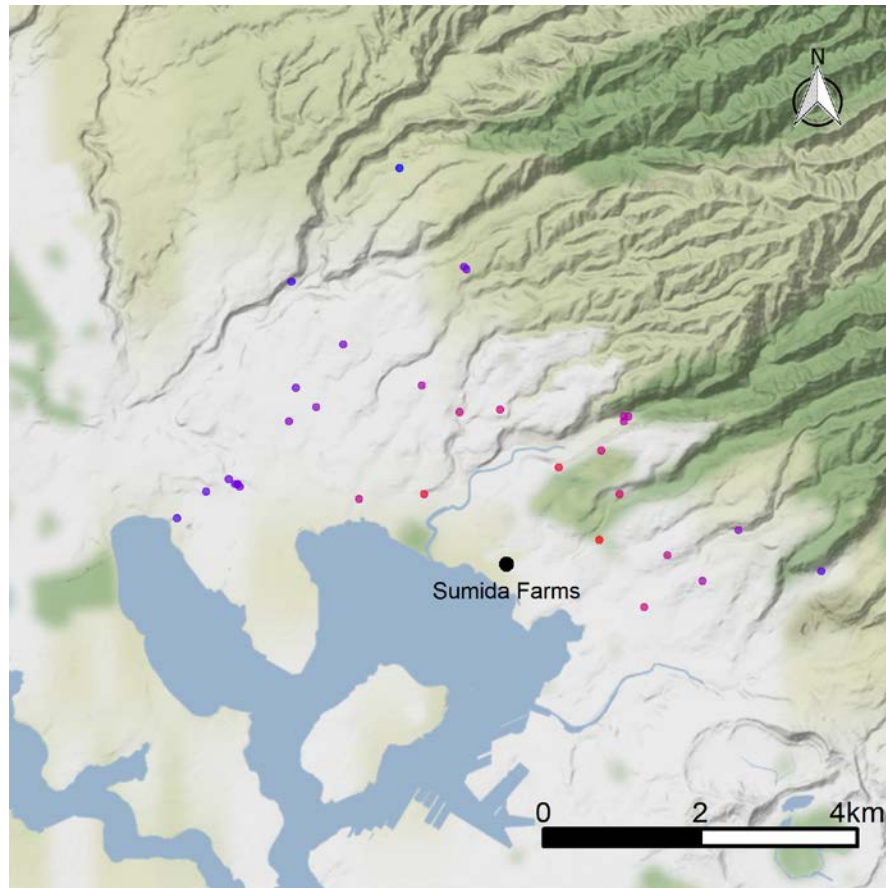

Supplement: S3 (10.1371/journal.pone.0235661.s003) [file journal.pone.0235661.s003]
